# Supplementary material
Source: Springer Nature journal article supplement (https://www.springermedizin.de/resource/supplementary/12961_2013_293_MOESM2_ESM.pdf/9570980)
Supplement: MOESM2 [file 9570980]

## *Appendix 2*

### *Databases searched by country, regional and global research teams*

African Index Medicus, African Journals On Line, Cochrane Database of Systematic Reviews, Canadian Cochrane Network and Centre Database, CINAHL, Database of Abstracts of Reviews of Effects, Eastern Mediterranean Region Index Medicus, EconLit, EMBASE, ELDIS, Google Scholar, Health Systems Evidence (McMaster University), HINARI, ISI, LILACS, MEDLINE, PubMed, REMED, SCOPUS, Sociological Abstracts, Web of Science, WHOLIS

Farsi language: Iran MEDEX, SID

Databases of international and regional organizations: MENA UNDP, UNICEF, World Bank, WHO EMRO
